# Supplementary material for: Cancer Immunoprevention and Public Health
Source: Front Public Health. 2017 May 8;5:101. doi: 10.3389/fpubh.2017.00101 (PMC5421153; doi:10.3389/fpubh.2017.00101)
Supplement: Supplementary file 1 [file Table_1.XLSX]

## Sheet: Orru-2013
Supplementary Table 1A. SNPs reported to show associations with immune parameters by Orru et al (2013)
ST5A	ST5B		n=119
rs3845548	rs78213219
rs10919544	rs9425881
rs396991	rs139925075
rs396991	rs4601641
rs55971447	rs10206629
rs77995425	rs11124658
rs71632979	rs10188010
rs75773457	rs58740162
rs79593466	rs114126349
rs71581423	rs6547705
rs58055840	rs2322659
rs3933769	rs1768126
rs116188887	rs7632823
rs58905133	rs11919488
rs7559619	rs62293791
rs13011383	rs192499448
rs12712610	rs17472933
rs6736259	rs7735802
rs6751481	rs61242782
rs28578699	rs60583357
rs10203706	rs114555025
rs7583259	rs111926849
rs57553427	rs13213324
rs57553427	rs75009835
rs11896593	rs60601161
rs12712613	rs116381161
rs3020728	rs115438652
rs2944254	rs1964993
rs4431216	rs393494
rs6535445	rs12702292
rs117765619	rs4259369
rs116654888	rs10274290
rs2395476	rs2015549
rs115615758	rs117766011
rs113534101	rs10999427
rs6923504	rs117319079
rs115593842	rs569184
rs111752270	rs12281654
rs116437952	rs2216211
rs78565689	rs11609894
rs61839660	rs113656395
rs7893324	rs28712711
rs8463	rs7166529
rs10882630	rs8040391
rs7099515	rs4558417
rs117568941	rs7188603
rs10882634	rs113520903
rs1890187	rs12453005
rs117958583	rs2106335
rs76941118	rs11872252
rs4918962	rs74400715
rs1933172	rs12985647
rs7094484	rs78215990
rs3934409
rs7069030
rs10748642
rs11517041
rs10748649
rs3181132
rs2861152
rs3181124
rs7088961
rs117592294
rs12416931
rs76771478
rs2855537
rs9520836
rs9924520

## Sheet: Roederer-2015
Supplementary Table 1B. SNPs reported to show associations with immune parameters by Roederer et al (2015)
T1/ST5/ST6	n=709
rs7096317
rs2275759
rs7086986
rs6584022
rs6584023
rs7071836
rs10748643
rs10882660
rs10882656
rs7095587
rs10748642
rs5014871
rs4551688
rs4431963
rs2153913
rs2185818
rs11188486
rs4074424
rs11188497
rs4075310
rs2051052
rs1342790
rs3181131
rs7088584
rs7074403
rs2226163
rs10748648
rs10882673
rs3814159
rs1418709
rs4918962
rs10882657
rs1933165
rs3934409
rs2861147
rs2861148
rs6584027
rs3929900
rs10786236
rs4582902
rs3176881
rs3176891
rs10736093
rs1573112
rs7067762
rs10882676
rs2734565
rs10882675
rs2617170
rs2617171
rs1841957
rs1841958
rs4396219
rs11053802
rs2617160
rs2733852
rs2617150
rs1049174
rs2617149
rs1049172
rs1351113
rs10494359
rs7552317
rs7529425
rs9427399
rs7515174
rs7539468
rs6671753
rs7529225
rs4075311
rs1340837
rs7975996
rs12722986
rs12746613
rs867624
rs10494360
rs7978962
rs11053803
rs4512761
rs11598475
rs2861153
rs11188444
rs10509686
rs4918972
rs10882671
rs1891536
rs12354848
rs11188504
rs7089668
rs1935815
rs17461546
rs12357173
rs11188455
rs12358481
rs17462179
rs17553401
rs4918966
rs3176895
rs11188484
rs2861151
rs10882649
rs7074866
rs1801274
rs3181122
rs4258314
rs7091088
rs1935814
rs12824474
rs11188417
rs11188411
rs10743897
rs10845142
rs2682472
rs1967432
rs11188407
rs2900421
rs10772285
rs11188516
rs10882644
rs11188394
rs11188513
rs4037
rs2296691
rs749050
rs10882643
rs6671847
rs3793749
rs7551957
rs12139150
rs2297788
rs7079312
rs12244559
rs7894648
rs7920801
rs10882651
rs10882652
rs12244124
rs9663413
rs11188393
rs6427609
rs535449
rs501819
rs10882647
rs12359272
rs4614366
rs3181129
rs7895056
rs9427387
rs7512140
rs12359343
rs9427059
rs365264
rs2165090
rs2733845
rs1478309
rs1382264
rs2617156
rs12731669
rs10786247
rs2417734
rs1382265
rs4657039
rs2733840
rs2255336
rs2617151
rs2617152
rs7077566
rs7511868
rs2255364
rs2734414
rs11188530
rs2099684
rs6694403
rs2682508
rs17382898
rs6488285
rs11188531
rs4764430
rs10509695
rs12411569
rs7922217
rs7980470
rs7097572
rs1926195
rs6586165
rs1324551
rs7310643
rs10882654
rs4917702
rs4917703
rs6586163
rs6586164
rs1926196
rs7955196
rs12830618
rs12821887
rs4657090
rs4344425
rs1417579
rs4415856
rs723177
rs10786240
rs10786241
rs10882686
rs1390942
rs12055597
rs12819494
rs728010
rs1000633
rs1322401
rs7754559
rs9362213
rs9344521
rs6989379
rs10753610
rs9362211
rs1340976
rs12462651
rs9344528
rs1590279
rs7301582
rs2734442
rs28709317
rs4487548
rs9344525
rs1570311
rs9344524
rs7772233
rs12662033
rs9362218
rs7069750
rs4492900
rs4144167
rs1926194
rs4244321
rs7910825
rs7908691
rs2147420
rs4406737
rs4406738
rs9353315
rs4400191
rs4918979
rs12783226
rs11053781
rs9444346
rs4918959
rs4818908
rs12135523
rs3017072
rs4481960
rs7096610
rs11203146
rs2861150
rs7791642
rs6942065
rs10882690
rs1800682
rs3176894
rs9359655
rs1926188
rs10917717
rs2031613
rs11188427
rs11142553
rs1571020
rs2234978
rs4934435
rs7092857
rs4373339
rs4565270
rs1053905
rs17603259
rs12778814
rs11829861
rs2147419
rs7897091
rs1933164
rs7753022
rs10743737
rs10771789
rs7895976
rs17804971
rs2536690
rs2536879
rs11188397
rs2296692
rs12768006
rs10509688
rs10844110
rs2536929
rs10771901
rs7962112
rs10882639
rs3829157
rs12826560
rs2640497
rs4803410
rs9359656
rs1934908
rs4459617
rs9450280
rs12414904
rs6698806
rs9415637
rs12524836
rs546427
rs7972757
rs1483972
rs10898490
rs7072291
rs2241006
rs4763630
rs9450282
rs483920
rs4940382
rs727870
rs7904410
rs2596457
rs7903617
rs1512181
rs4745455
rs7921331
rs6427618
rs10771915
rs10800309
rs10771920
rs10844140
rs1020812
rs10786227
rs10736096
rs10882638
rs10882640
rs943342
rs2296689
rs10882641
rs6696531
rs17576123
rs1121581
rs10256721
rs1409709
rs10494086
rs17576305
rs9362215
rs2596460
rs12605690
rs1588616
rs7908420
rs9294335
rs2341479
rs12098522
rs526928
rs527043
rs17656941
rs11188434
rs6544593
rs7908923
rs12406801
rs10770954
rs17247593
rs9353058
rs9956450
rs6931295
rs6454468
rs10786250
rs7906450
rs1360955
rs7765636
rs2027200
rs2523691
rs6656465
rs4675676
rs907539
rs11551944
rs7928900
rs7945972
rs7128970
rs7127454
rs11551942
rs7128040
rs744695
rs744696
rs2947737
rs17110999
rs7943981
rs7111395
rs1377024
rs1254565
rs11188385
rs13048621
rs7771187
rs494562
rs638745
rs550499
rs527670
rs640093
rs522915
rs522129
rs520090
rs490079
rs573892
rs573737
rs632163
rs567686
rs7767626
rs7767800
rs4802100
rs10509689
rs17110981
rs11595248
rs11593038
rs12779833
rs11598540
rs13431501
rs17188476
rs17248137
rs17248200
rs17248248
rs7668508
rs7531054
rs6434984
rs11592675
rs1420318
rs10502722
rs8001815
rs1327905
rs11197638
rs12698422
rs4373337
rs12405083
rs2823407
rs1843371
rs7724830
rs554113
rs637346
rs1933168
rs1744122
rs12254317
rs9449410
rs1041901
rs7660335
rs17246948
rs13095971
rs12283240
rs17110984
rs7996685
rs640478
rs3760657
rs7961041
rs12763743
rs749049
rs1379274
rs17187392
rs12767650
rs12770849
rs3176888
rs3176886
rs4933870
rs12455189
rs1409710
rs3793751
rs2275272
rs12242629
rs12244656
rs17432429
rs17432456
rs17432532
rs17347902
rs17347944
rs7073313
rs6817802
rs6858860
rs17247733
rs339758
rs12072379
rs11581697
rs17432763
rs17432833
rs1106646
rs7300782
rs7966062
rs11592809
rs17687156
rs10882698
rs2841427
rs7208816
rs1503813
rs6776689
rs11949989
rs1240401
rs12284730
rs12882084
rs1480720
rs576080
rs11001490
rs10491603
rs12975556
rs17040907
rs914121
rs10509697
rs1004134
rs12359255
rs10901383
rs12359767
rs6784201
rs11051112
rs10485697
rs4235826
rs4869829
rs4760833
rs11079580
rs6465074
rs4726305
rs11244509
rs11244510
rs11244511
rs11244512
rs4593336
rs11699773
rs7292105
rs4726304
rs1373483
rs12664908
rs17539192
rs17480206
rs1359267
rs1031936
rs3824730
rs782916
rs2650220
rs5998412
rs12118043
rs6827930
rs4359719
rs4919213
rs4267828
rs10479334
rs9450269
rs10509696
rs11244507
rs11678007
rs12522587
rs12793729
rs2161842
rs17122877
rs7826396
rs474548
rs12619740
rs9450271
rs7683155
rs2039776
rs9529217
rs11841300
rs4076018
rs17411858
rs5996715
rs3740286
rs12826226
rs1535237
rs2894393
rs4878012
rs11703441
rs3812138
rs9344518
rs1322404
rs1322403
rs6781266
rs11073587
rs1920410
rs1920412
rs7927653
rs13073939
rs9344530
rs9362223
rs7093697
rs7909989
rs11244503
rs683218
rs1359265
rs551901
rs684847
rs12355544
rs11889230
rs11581297
rs12053654
rs2126218
rs9450270
rs17062448
rs11001471
rs9404130
rs7927765
rs7669141
rs9399726
rs2399670
rs17760616
rs4662995
rs521005
rs7921467
rs1471256
rs11581865
rs6836434
rs2235432
rs9485535
rs9485536
rs10152951
rs6899948
rs2298019
rs6768627
rs1381871
rs11907758
rs765770
rs17686131
rs12805212
rs17037206
rs1568061
rs7900509
rs1353694
rs7946612
rs7918317
rs17102238
rs4468297
rs4436491
rs2147274
rs9353309
rs7928098
rs6494354
rs875545
rs11086819
rs9353310
rs7750970
rs6919207
rs4624841
rs7753711
rs10469877
rs2955262
rs16878780
rs7096248
rs3812139
rs11073588
rs2589144
rs9575250
rs11244505
rs4077757
rs9613123
rs6483694
rs2057033
rs1435984
rs3016391
rs7126555
rs17691916
rs1462900
rs11143089
rs10917750
rs6666342
rs6540648
rs12773566
rs12137220
rs9427705
rs494688
rs10062483
rs4761750
rs1034763
rs12804349
rs1444348
rs4791194
rs1515567
rs4097492
rs3088325
rs42279
rs6877543
rs16875358
rs12413714
rs10056093
rs11001475
rs333871
rs3781596
rs1522588
rs16969143
rs5752350
rs13051355
rs16839714
rs2881470
rs12143601
rs9890245
rs16965223
rs16935713
rs12807087
rs12789316
rs12788464
rs6005866
rs12804991
rs7952354
rs7901656
rs7746065
rs753441
rs7685380
rs13124578
rs5800
rs13440225
rs2929416
rs9921200
rs7297375
rs3792558
rs6919282
rs17102882
rs9873530
rs1190996
rs12352797
rs11624210

## Sheet: Candidate Gene Studies
Supplementary Table 1C. Immunoregulatory gene SNPs reported to have associations with cancer susceptibility in candidate gene studies
SNPs		n=84
rs1041981
rs1049174
rs10519612
rs1059293
rs10833
rs10889677
rs11064392
rs1143627
rs1143634
rs11466653
rs11536898
rs11721827
rs12203592
rs12508721
rs13474464
rs1535045
rs1585215
rs16944
rs17007695
rs1799724
rs1799964
rs1800469
rs1800629
rs1800630
rs1800686
rs1800795
rs1800797
rs1800871
rs1800872
rs1800890
rs1800896
rs1801274
rs1801275
rs187084
rs187238
rs1883832
rs1905339
rs1946518
rs2066844
rs2066845
rs2069727
rs2107538
rs2229094
rs2234711
rs2239704
rs2243250
rs2256965
rs2296135
rs231775
rs2395185
rs2430561
rs2637988
rs266085
rs2834202
rs28362491
rs2856968
rs2939
rs3135388
rs33965070
rs352139
rs352144
rs361525
rs3755377
rs375947
rs3765459
rs3775290
rs3775291
rs3783553
rs3804099
rs3804100
rs4073
rs419598
rs478889
rs4810485
rs4986790
rs4986791
rs5742909
rs5743708
rs583911
rs641734
rs6973569
rs909253
rs915654
rs9264942
